# Supplementary material for: Long term performance cobalt oxide silica membrane module for high temperature H2 separation
Source: Royal Society of Chemistry journal article supplement (doi:10.1039/c2ee03247c), 2011-12-22
Supplement: c2ee03247c.pdf [file c2ee03247c.pdf]

## Supplementary Information

### Long Term Performance of Multi-tube Cobalt Oxide Silica Membrane Module for High Temperature Gas Separation

Christelle Yacou,<sup>a</sup> Simon Smart<sup>a</sup> and João C. Diniz da Costa<sup>\*a</sup>

#### ESI-1. Nitrogen Adsorption Isotherms

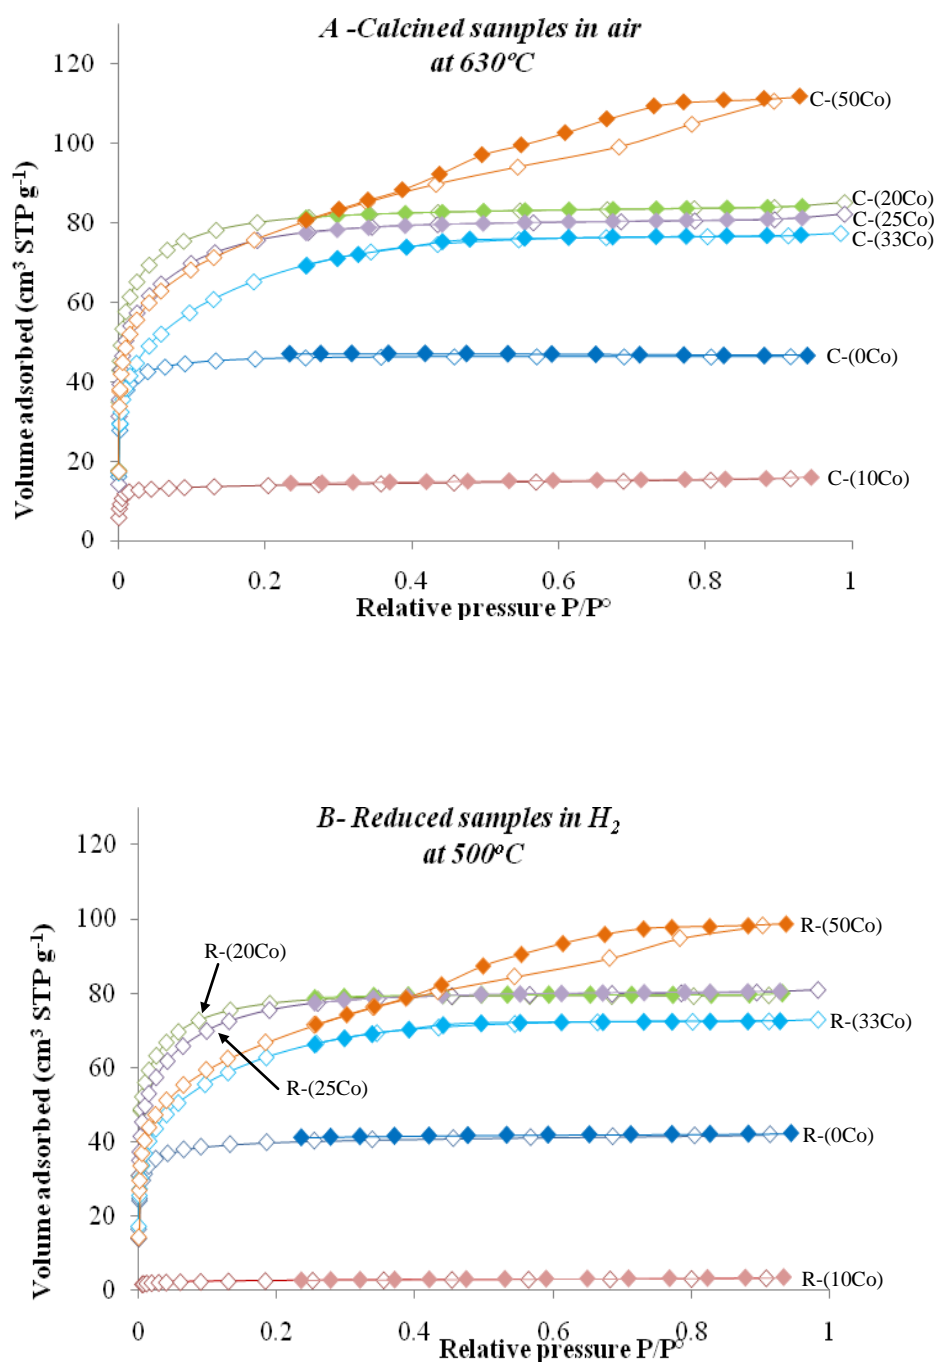

Figure S1. N<sub>2</sub> sorption isotherms at 77K of the samples calcined in air at 630°C (A), and reduced at 500°C under H<sub>2</sub> (B).
